# Supplementary material for: Pyrene-sensitised near-IR luminescence from ytterbium and neodymium complexes
Source: Royal Society of Chemistry journal article supplement (doi:10.1039/b401302f), 2004-01-01

# Fitted time-resolved profiles for the metal centred luminescence from the complexes

$[L^2.Yb.L^1]^-$   
H<sub>2</sub>O 550 ns

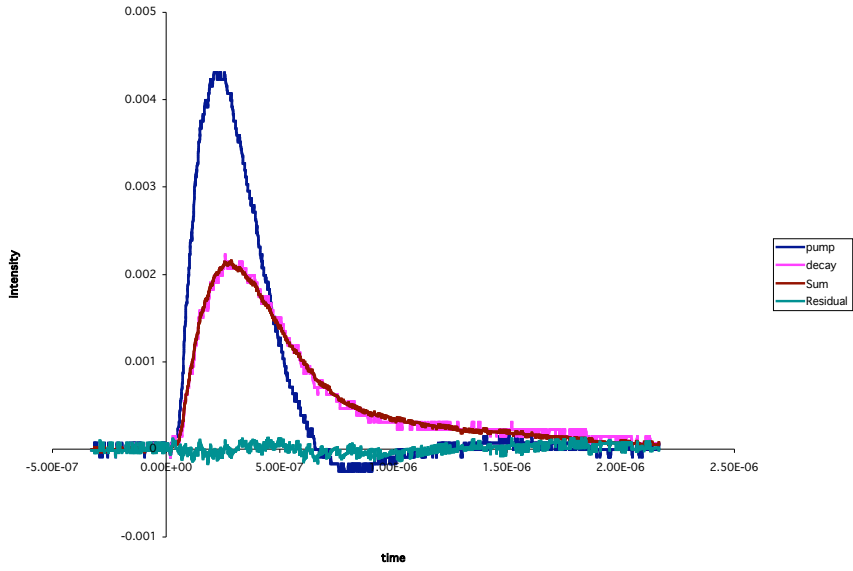

D<sub>2</sub>O 2520 ns

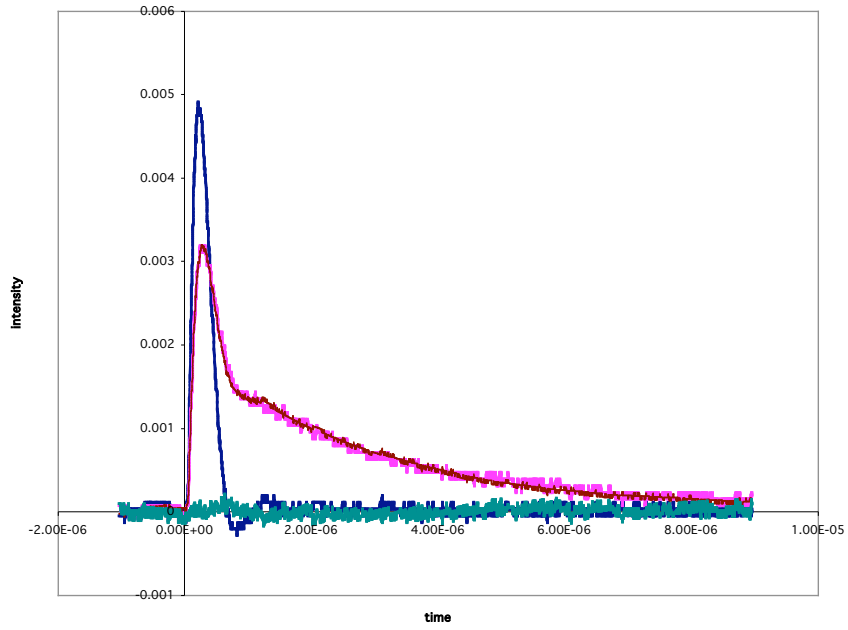

$[L^2.Nd.L^{-1}]$   
H<sub>2</sub>O 145 ns

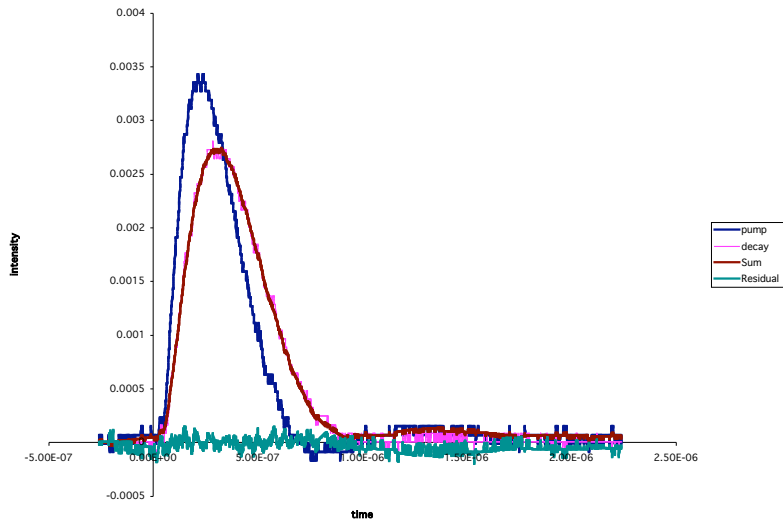

D<sub>2</sub>O 750 ns

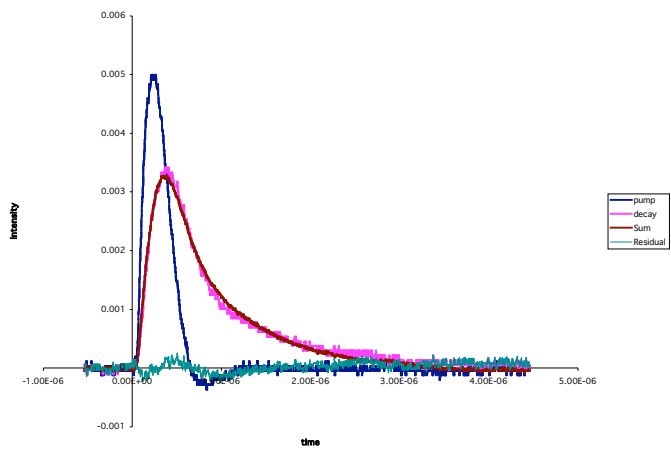

Nd.L<sup>3</sup>

H<sub>2</sub>O

Rise <5 ns Decay 80 ns

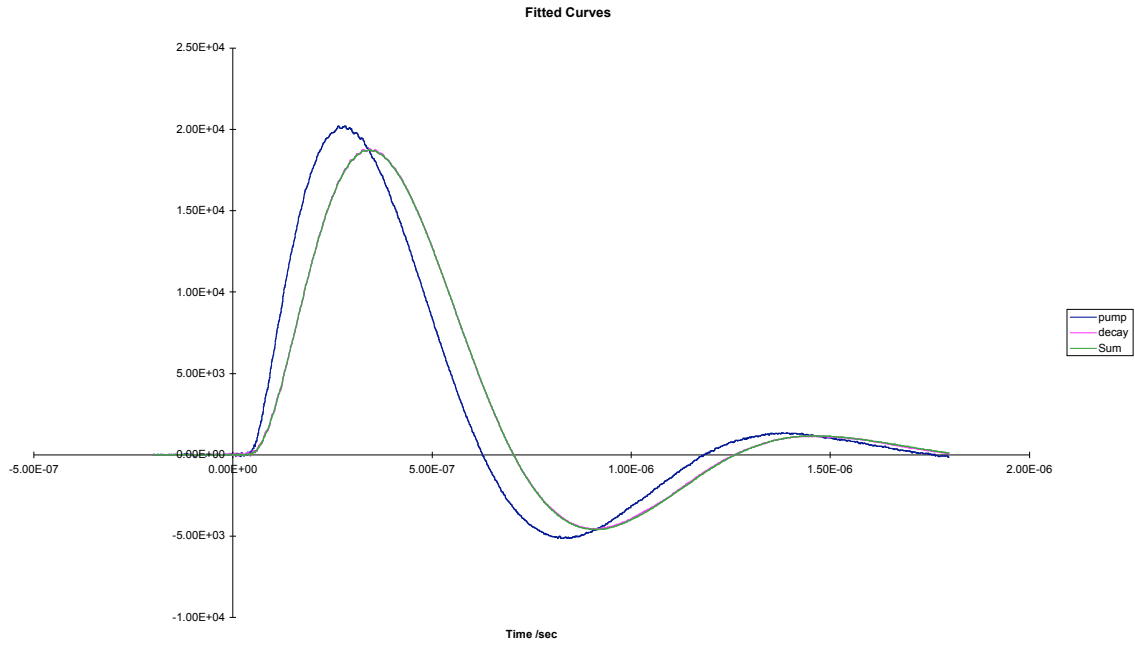

D<sub>2</sub>O

Grow <5ns Decay 320 ns

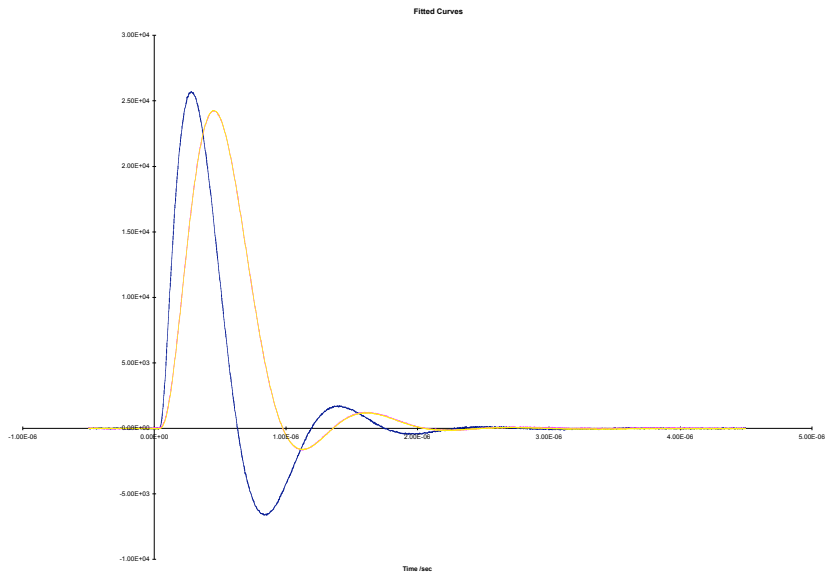

Nd L<sup>4</sup>  
H<sub>2</sub>O Rise time 70 ns Decay 220 ns

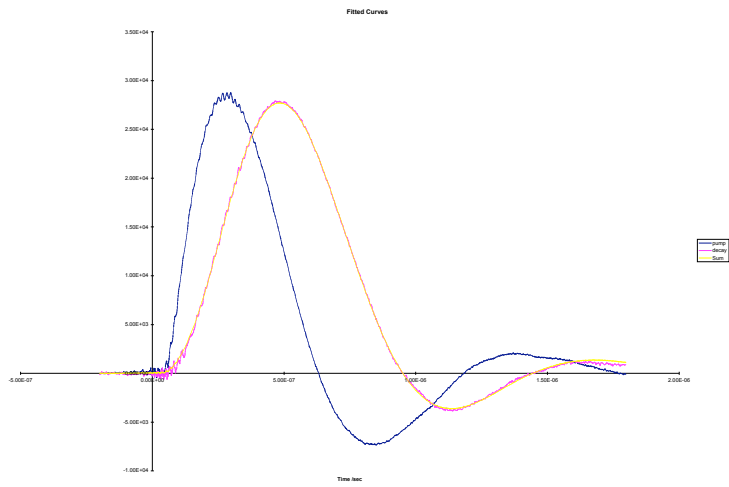

D<sub>2</sub>O

Risetime 210 ns Decay 312 ns

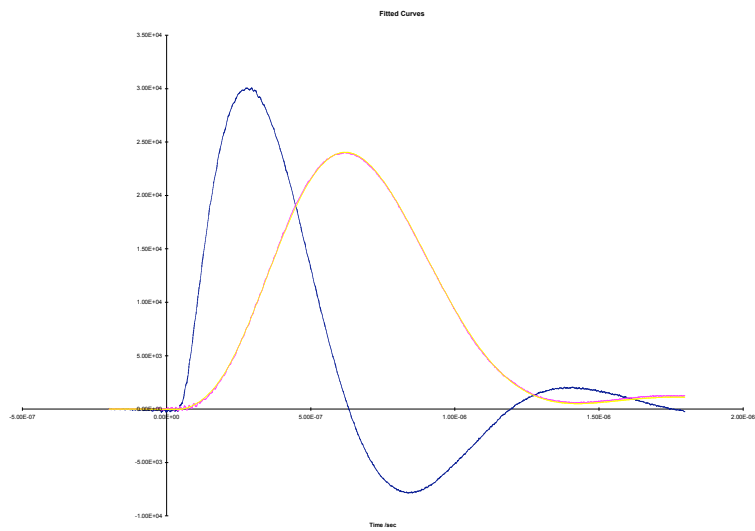

Yb L<sup>3</sup>  
H<sub>2</sub>O Risetime 15 ns decay 740 ns

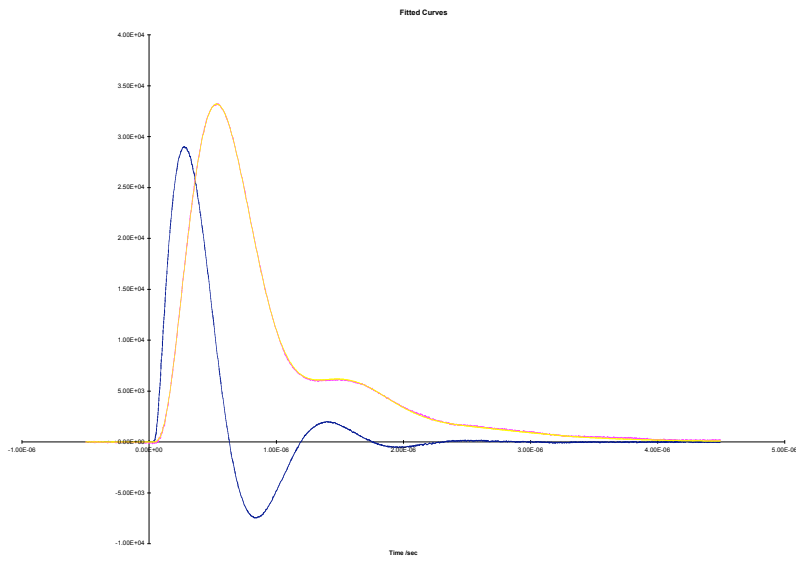

D<sub>2</sub>O Grow 5 ns decay 7445 ns

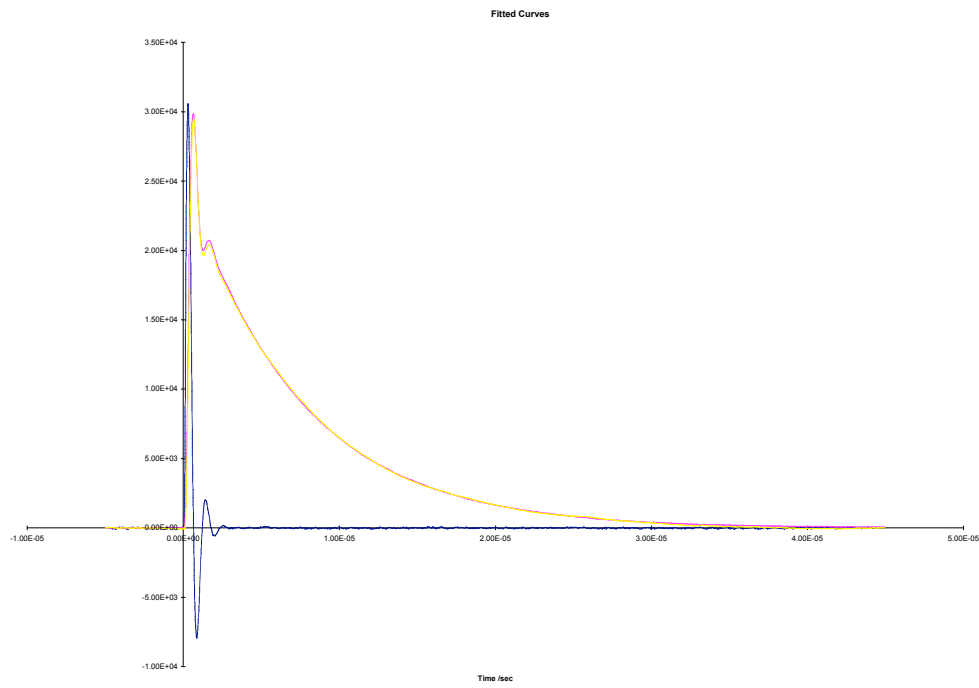

YbL<sup>4</sup>  
H<sub>2</sub>O rise time 125 ns decay 1340 ns

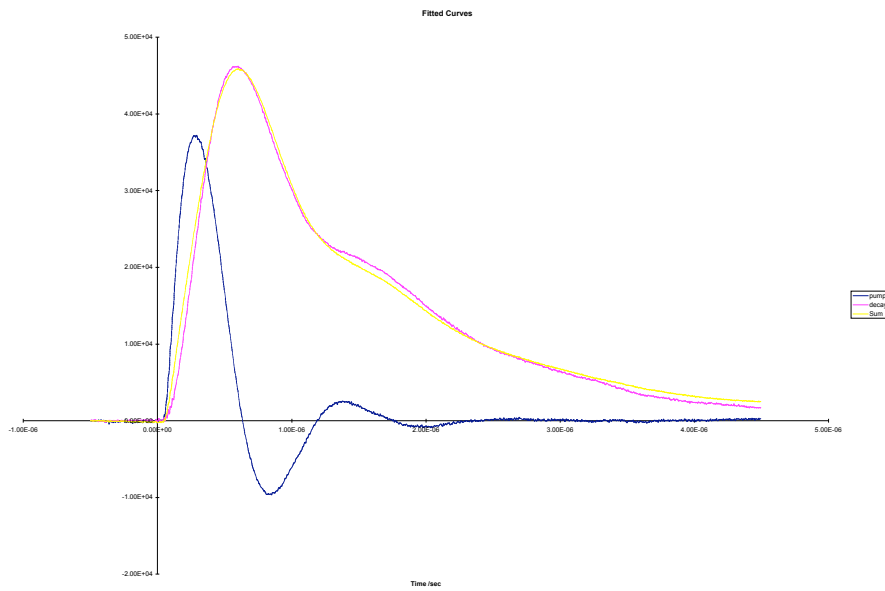

D2O (conventional fit)  
Risetime 790 ns Decay 7400 ns

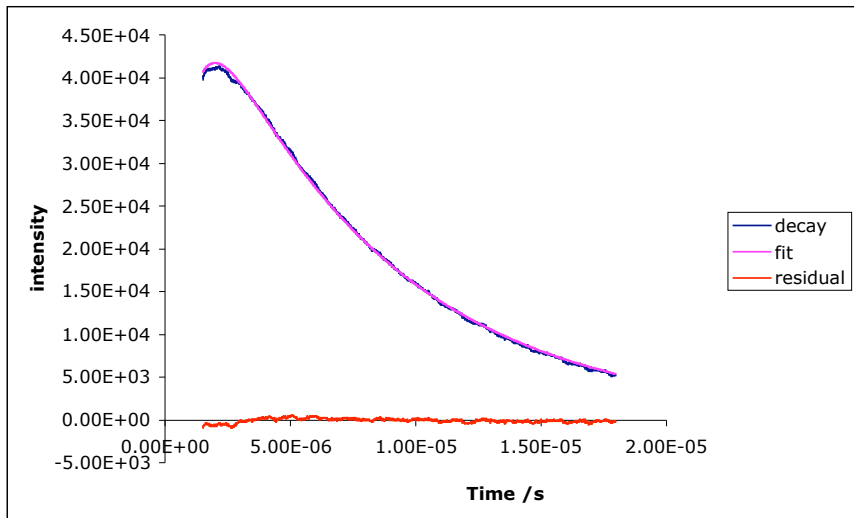

Supplement: b401302f.pdf [file b401302f.pdf]
